# Supplementary material
Source: Springer Nature journal article supplement (https://www.springermedizin.de/resource/supplementary/13063_2013_1326_MOESM7_ESM.pdf/9619826)

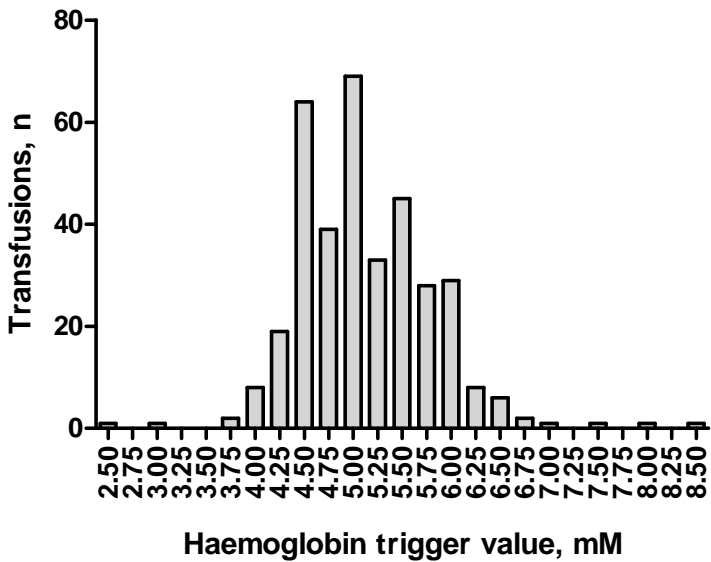

Supplement: MOESM7 [file 9619826]
